# Supplementary material
Source: ML conference proceedings conference paper supplement (https://proceedings.neurips.cc/paper_files/paper/2023/hash/04f61ec02d1b3a025a59d978269ce437-Abstract.html)
Supplement: Supplementary file 1 [file 04f61ec02d1b3a025a59d978269ce437-Supplemental-Conference.pdf]

# 1 Appendix A: Atari Add-One Ablations

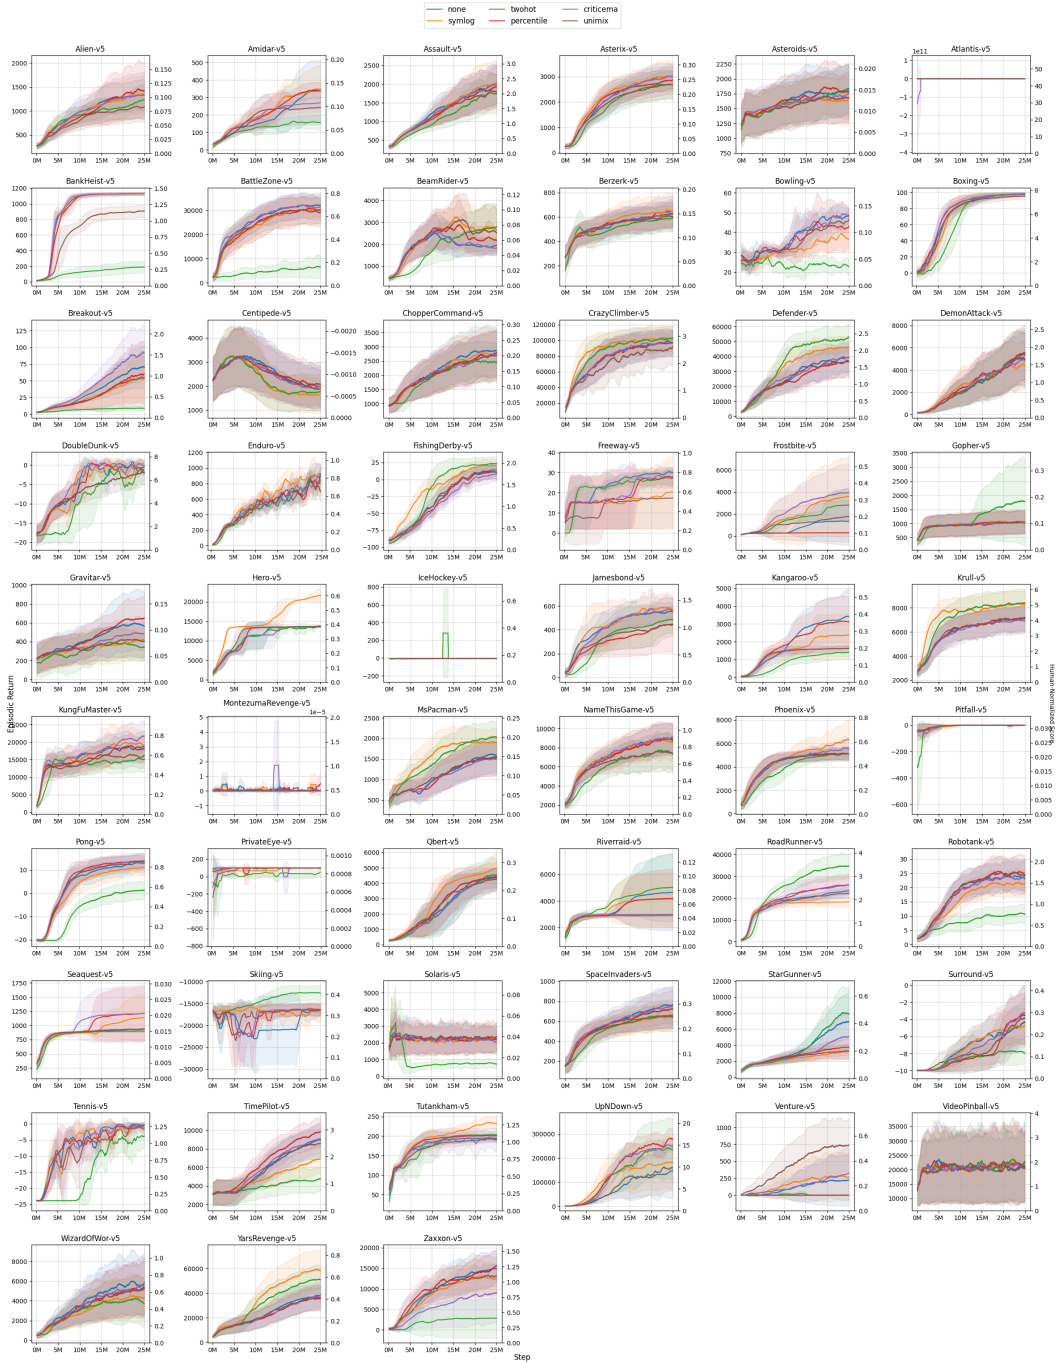

Figure 1: Add-one ablations for the Arcade Learning Environment with reward clipping. Each line shows the median scores for 57 environments, averaged over 3 seeds, across training.

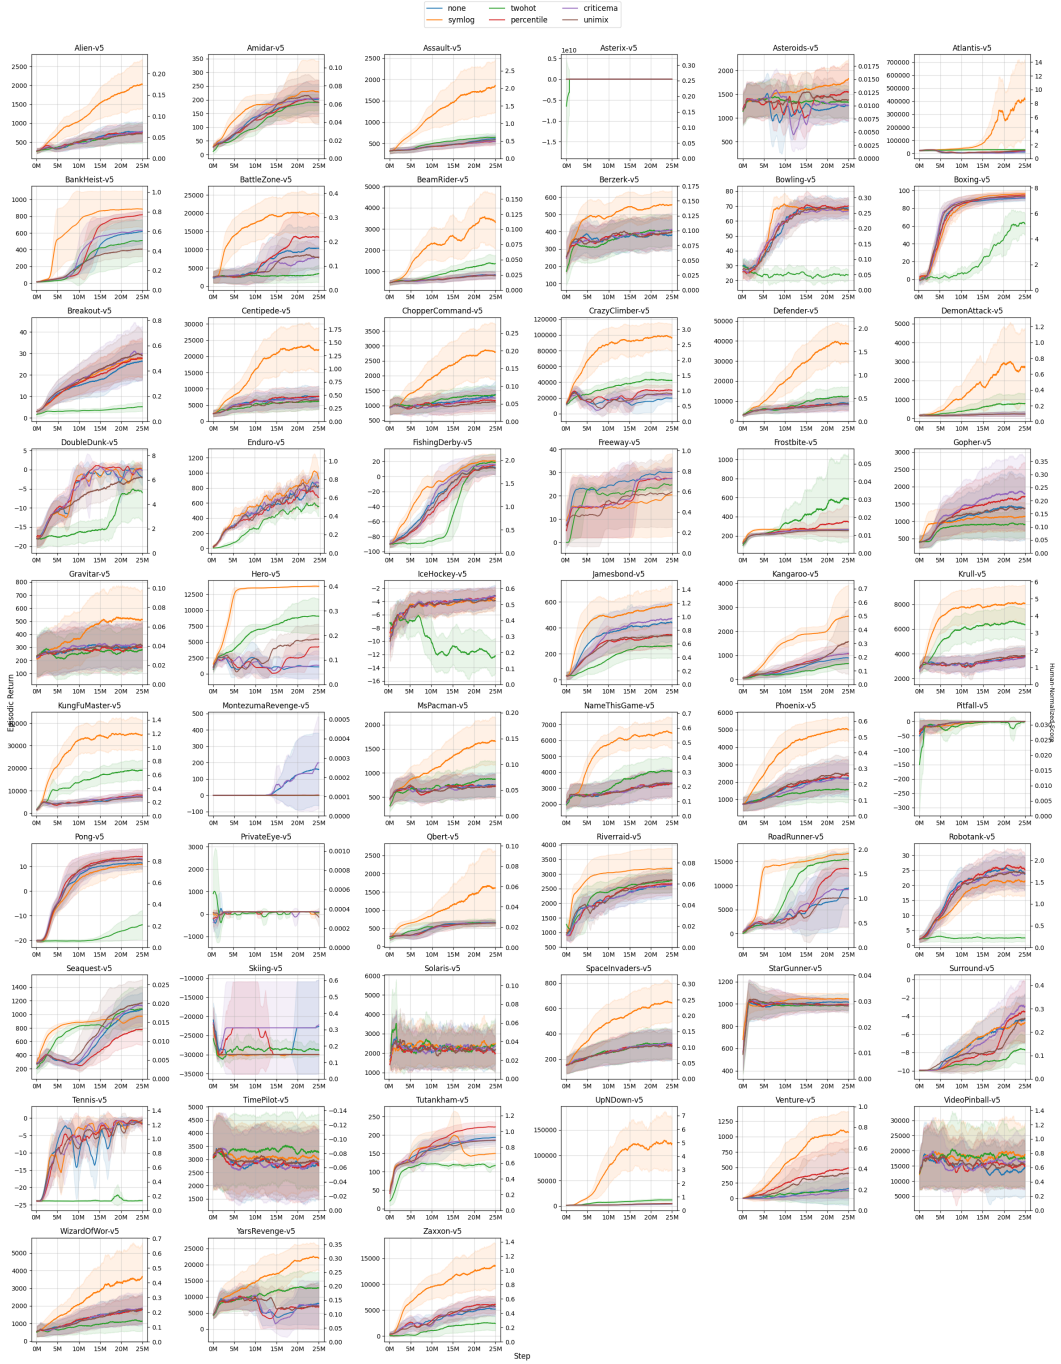

Figure 2: Add-one ablations for the Arcade Learning Environment without reward clipping. Each line shows the median scores for 57 environments, averaged over 3 seeds, across training.

## 2 Appendix B: Atari Drop-One Ablations

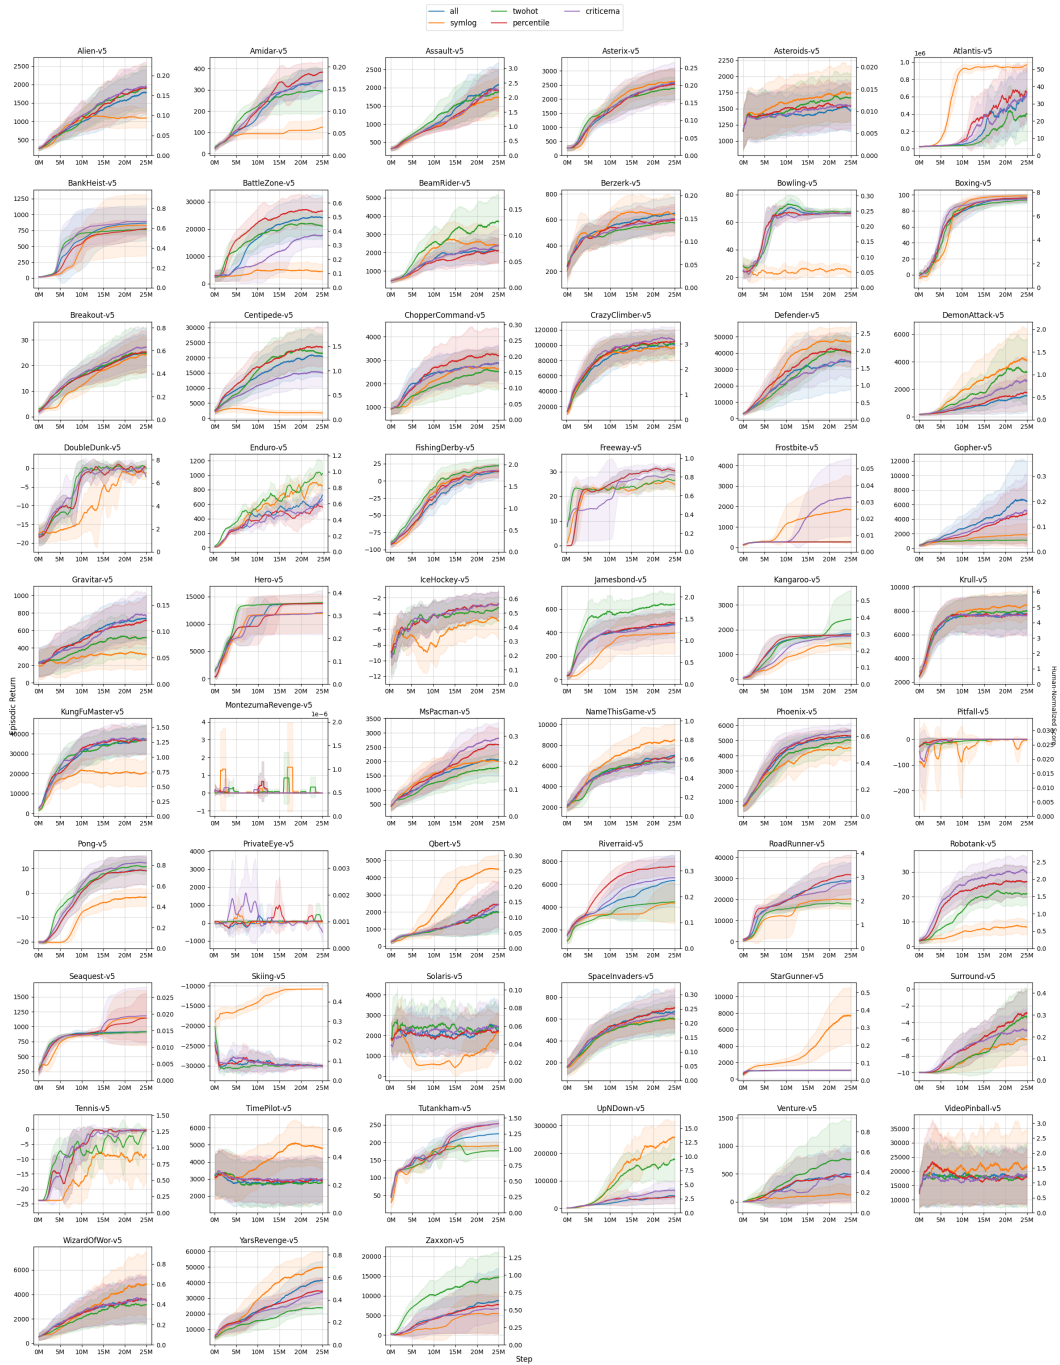

Figure 3: Drop-one ablations for the Arcade Learning Environment with reward clipping. Each line shows the median scores for 57 environments, averaged over 3 seeds, across training.

### 3 Appendix C: DeepMind Control Suite Add-One Ablations

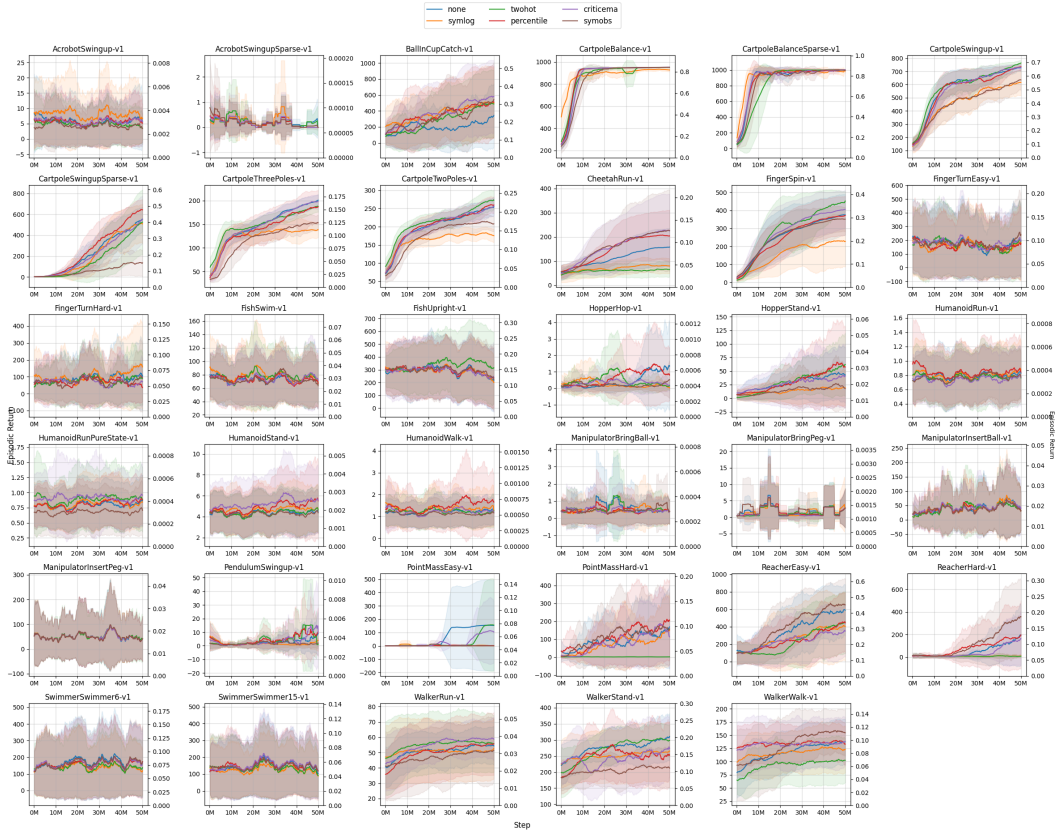

Figure 4: Add-one ablations for the DeepMind Control Suite. Each line shows the median scores for 35 environments, averaged over 5 seeds, across training.



## 4 Appendix D: DeepMind Control Suite Drop-One Ablations

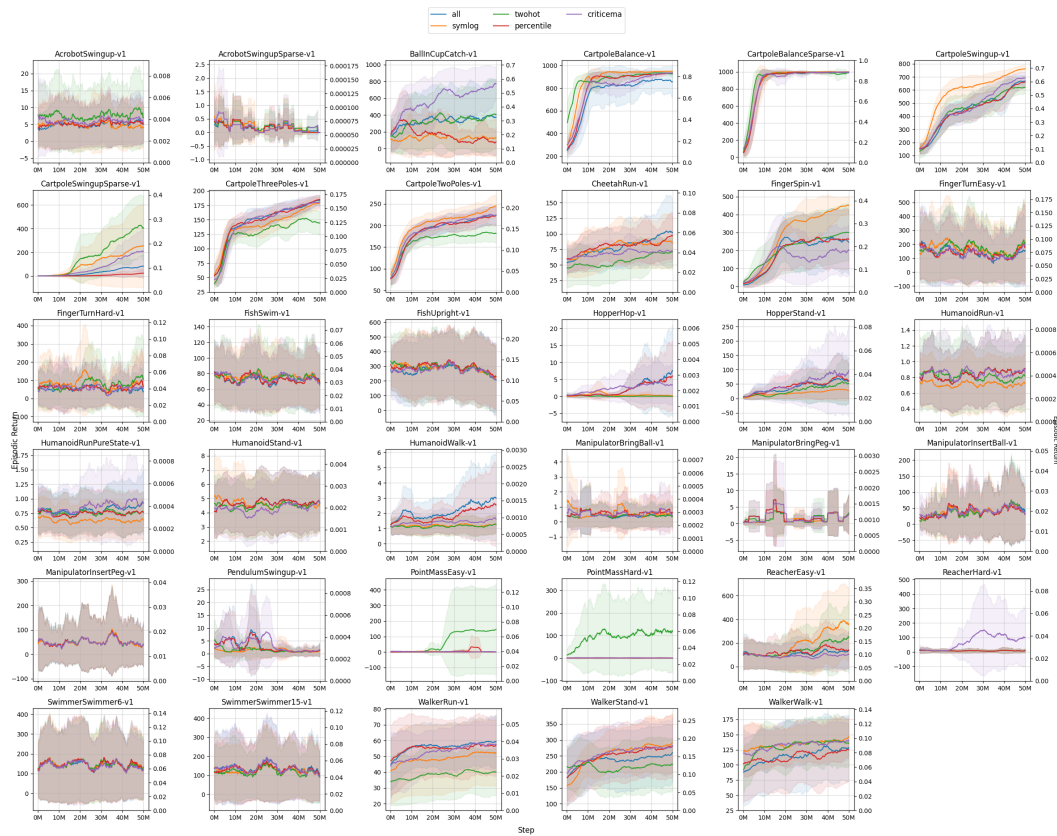

Figure 5: Drop-one ablations for the DeepMind Control Suite. Each line shows the median scores for 35 environments, averaged over 5 seeds, across training.

## 5 Appendix E: Architecture

6 We use the 20 million parameter XL DreamerV3 encoder and actor-critic architecture in PPO and  
7 compare its performance to the 1 million parameter Nature CNN used in the rest of our experiments.

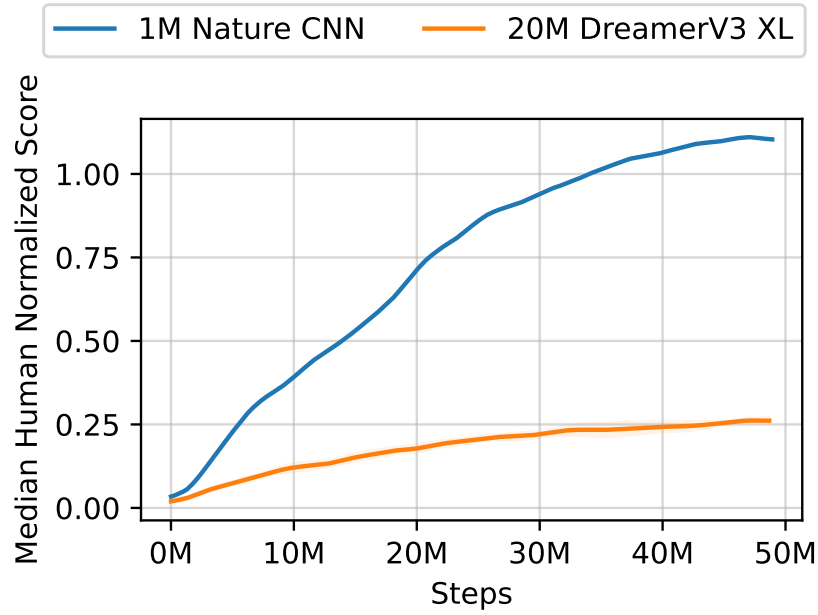

Figure 6: 20M DreamerV3 XL architecture vs. 1M Nature CNN. Figures show median performance averaged across 3 seeds and all 57 Atari environments.

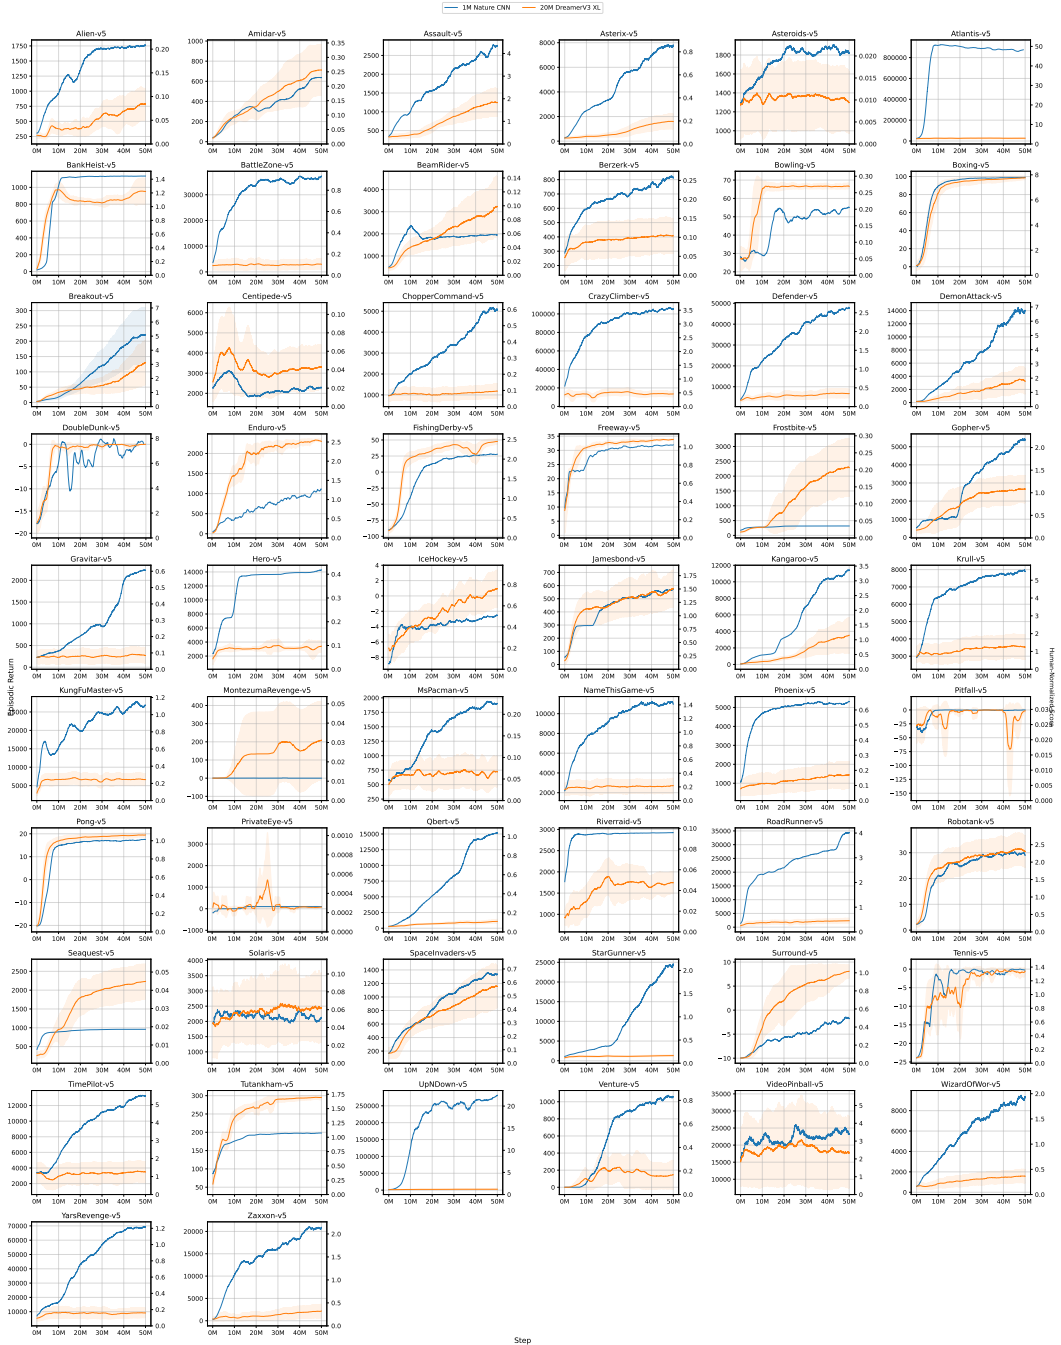

Figure 7: 20M Dreamer-v3 XL architecture (3 seeds) vs. 1M Nature CNN (1 seed).

## 8 **6 Appendix F: PPO Hyperparameters**

Table 1: The default PPO hyperparameters in CleanRL’s implementation, used for all experiments. The only change we make is increasing the number of environments for better time efficiency.

|                        |             |
|------------------------|-------------|
| Learning Rate          | $2.5e^{-4}$ |
| Environments           | 128         |
| Steps                  | 128         |
| $\gamma$               | 0.99        |
| GAE $\lambda$          | 0.95        |
| Minibatches            | 4           |
| Epochs                 | 4           |
| Clip coefficient       | 0.1         |
| Value loss clipping    | Enabled     |
| Entropy Coefficient    | 0.01        |
| Value loss coefficient | 0.5         |
| Max Grad Norm          | 0.5         |
